# Supplementary material for: Hollow microspherical LiFePO4/C synthesized from a novel multidentate phosphonate complexing agent
Source: Royal Society of Chemistry journal article supplement (doi:10.1039/c3ra23122d), 2013-01-01
Supplement: c3ra23122d.pdf [file c3ra23122d.pdf]

## Electronic Supplementary Information

### **Hollow microspherical $\text{LiFePO}_4/\text{C}$ synthesized from a novel multidentate phosphonate complexing agent**

Pengfei Xiao,<sup>a</sup>, Man On Lai,<sup>a</sup> and Li Lu<sup>\*a</sup>

<sup>a</sup> E3-04-01, 9 Engineering Drive 1, National University of Singapore, Singapore,  
117576.

Tel: (65)65162236; E-mail: luli@nus.edu.sg

## Experimental Section

### *Material preparation*

First, EDTMP and lithium hydroxide (LiOH) were dissolved in 80 °C de-ion water. The pH value of the solution was adjusted and maintained between 8 and 9 by addition of ammonia solution. Then, iron (II) acetate (Fe(AC)<sub>2</sub>) solution was slowly dripped into the previous mixed Li-EDTMP solution through a burette. Dark green transparent sol was obtained with rigid stirring. The designed element molar ratio of Li: Fe: P in the sol was 1: 1: 1, therefore molar ratio of the starting materials of LiOH, EDTMP and Fe(AC)<sub>2</sub> was 4:1:4. The sol was dried via two approaches as shown in Scheme. 1c in the main article. As for a conventional sol-gel route, the sol was kept at 80 °C with pH 8-9 with rigid stirring until a brown viscous gel was formed. The gel was then thoroughly dried in an 80 °C oven. As for the sol-gel-spray-drying route, the sol was rapidly sprayed and dried at 240 °C using a centrifuge spray-dryer (Shanghai Yacheng YC-015). The precursors were finally calcinated at 700 °C for 6 h in flowing purified argon to obtain the LiFePO<sub>4</sub>/C products.

### *Characterization*

Powder X-ray diffraction (XRD, Shimadzu XRD-6000, Cu-*K*α radiation) was used to determine the crystal structure with a scan rate of 0.5 degree min<sup>-1</sup> and a step-width of 0.02 degree. Micromorphologies of the synthesized LiFePO<sub>4</sub>/C composites were observed using field emission scanning electron microscope (FE-SEM, Hitachi S-4300) and transmission electron microscope (TEM, JEM-3010F). Carbon contents in LiFePO<sub>4</sub>/C composites were determined by thermo gravimetric

analysis (TGA) using Shimadzu DTG-60H.

### ***Electrochemical tests***

The working electrode comprised of the LiFePO<sub>4</sub>/C composites, carbon black (Super P<sup>TM</sup>) and polyvinylidene fluoride (PVDF, 99%, Sigma-Aldrich) in a ratio of 80:15:5 by weight. Active material loading densities were controlled in the range of 4-5 mg cm<sup>-2</sup>. Two electrode Swagelok<sup>TM</sup> type half cells were assembled in an argon glove box. One Celgard 2500<sup>TM</sup> separator was sandwiched between the working electrode and a 0.59 mm thick metallic lithium foil. The electrolyte consists of 1 M LiPF<sub>6</sub> in ethylene carbonate (EC), diethyl carbonate (DEC) and dimethyl carbonate (DMC) (DC: EC: DMC, 1:1:1, vol.) solutions. Galvanostatic charge-discharge cycling tests were carried out between 2.2 V and 4.3V using Maccor 4304 or Neware Battery Test Station BTS-5V1A. Discharge rate capability was test with a charge current of 0.1C and discharge currents from 0.1C to 30C, where 1C was defined to be 160 mA g<sup>-1</sup>.

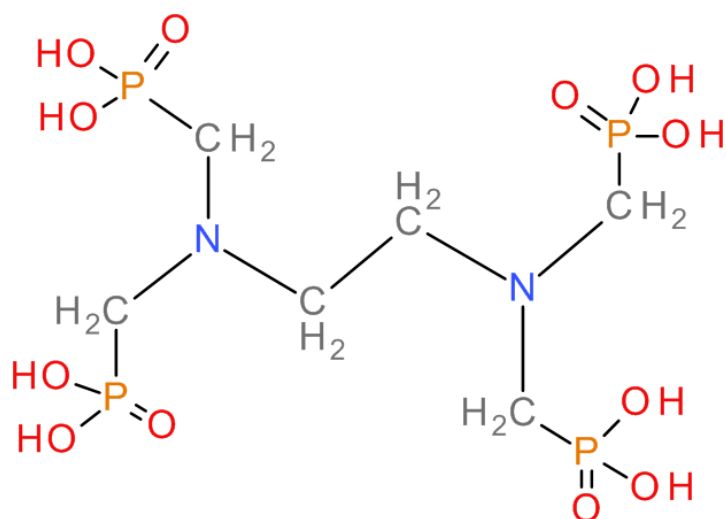

Fig. S1 Schematic of EDTMP molecular formula

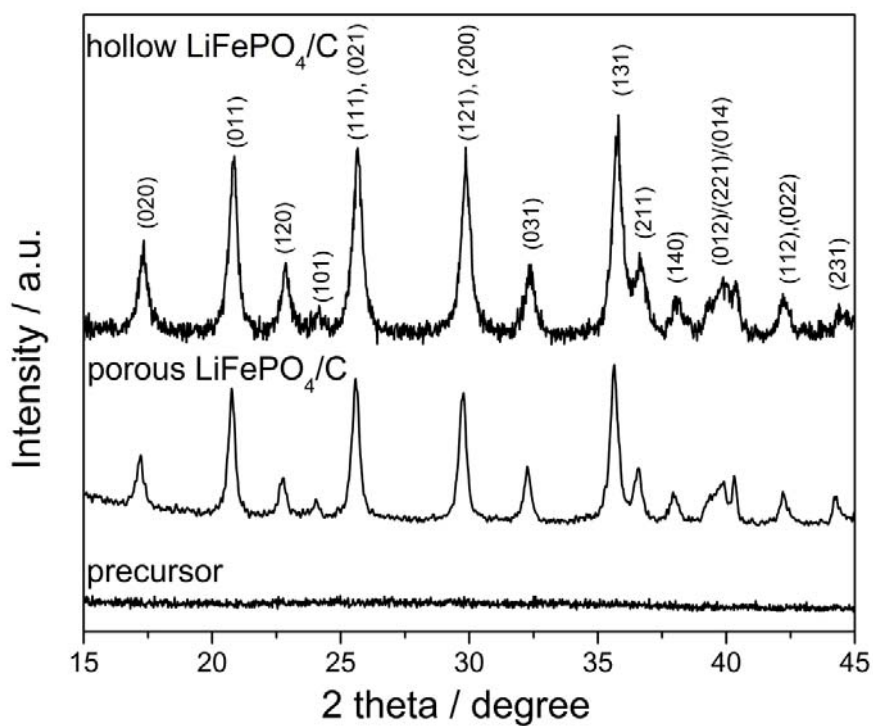

Fig. S2 XRD patterns of porous and hollow  $\text{LiFePO}_4$  as well as precursors

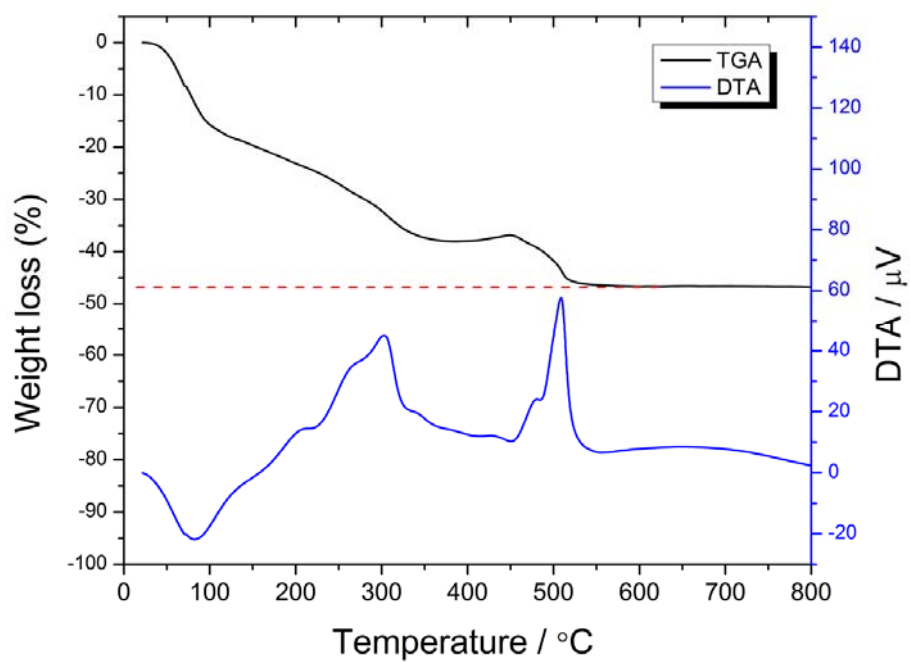

Fig. S3 TGA and DTA curves of the spray-dried precursor

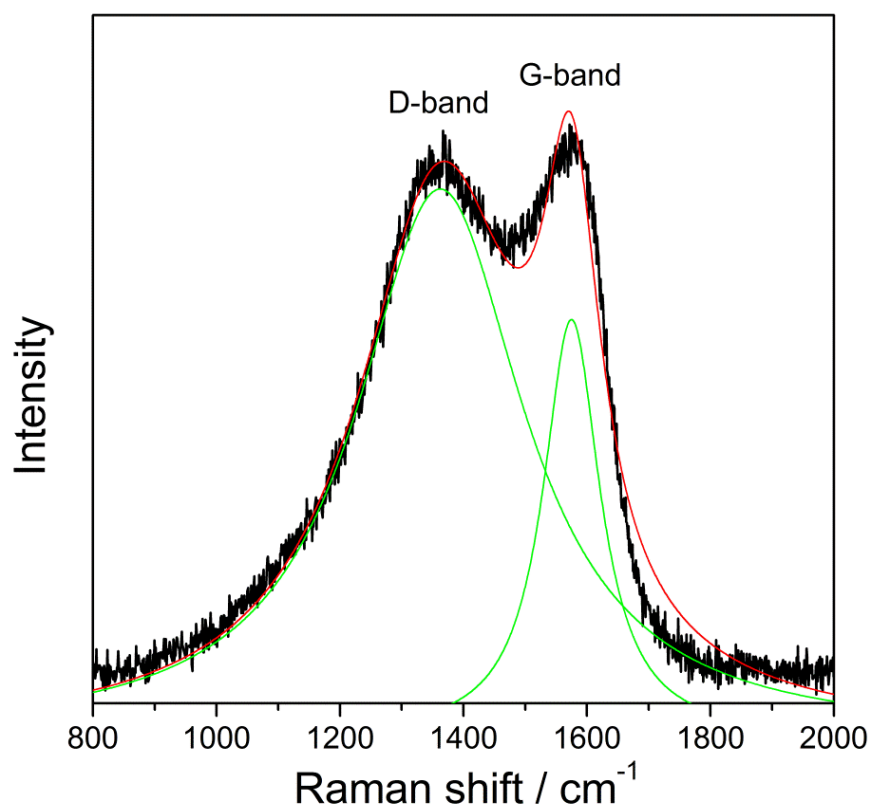

Fig. S4 Raman spectrum of the hollow LiFePO<sub>4</sub>/C

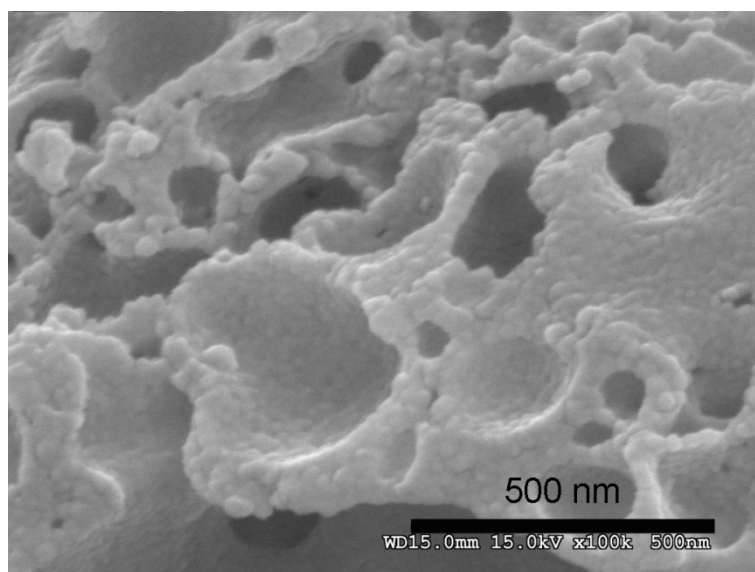

Fig. S5 SEM image of the porous LiFePO<sub>4</sub>/C

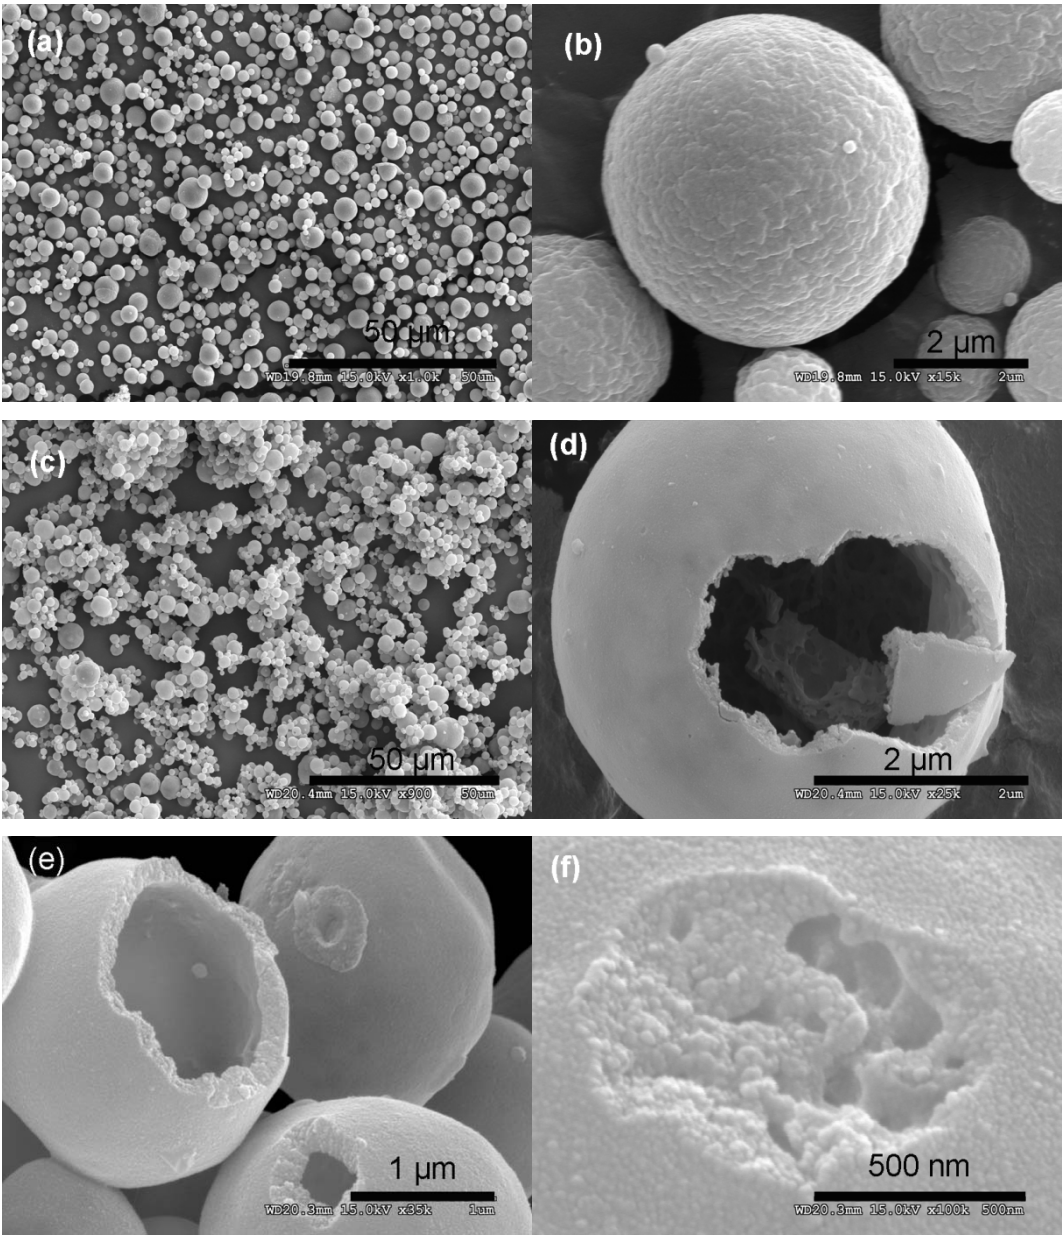

Fig. S6 Supplementary SEM images of (a, b) precursor to hollow LiFePO<sub>4</sub>/C, (c, d, e, f) hollow LiFePO<sub>4</sub>/C



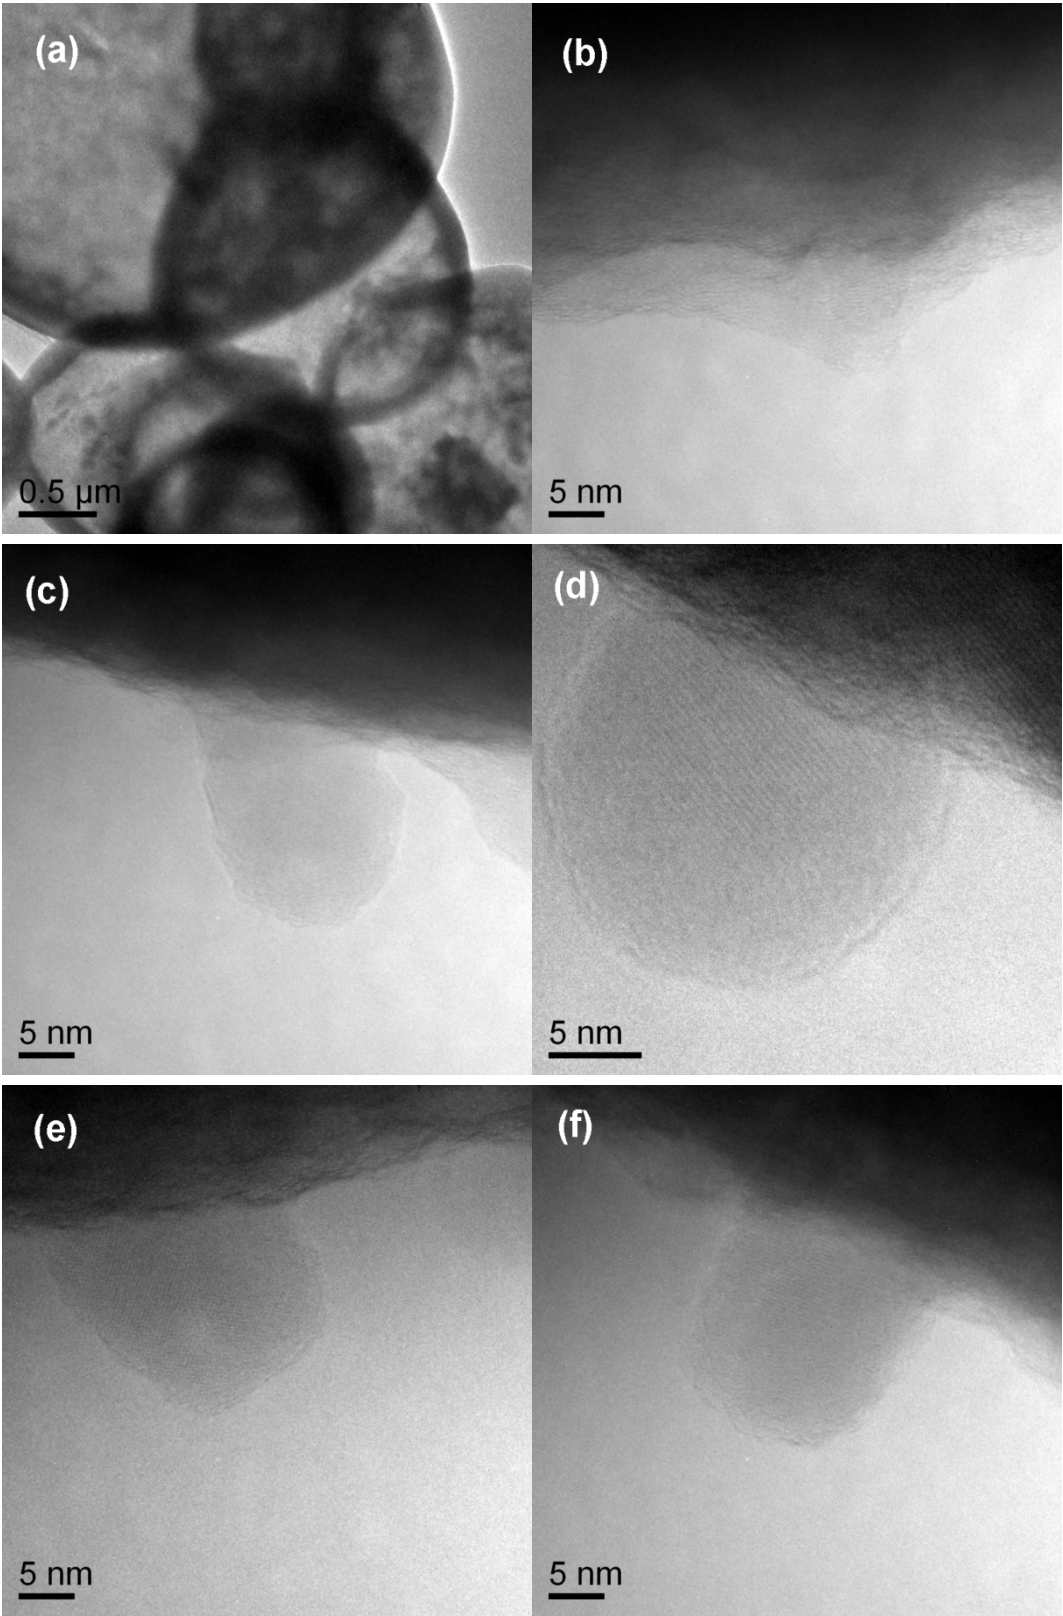

Fig. S7 Supplementary TEM images of hollow  $\text{LiFePO}_4/\text{C}$



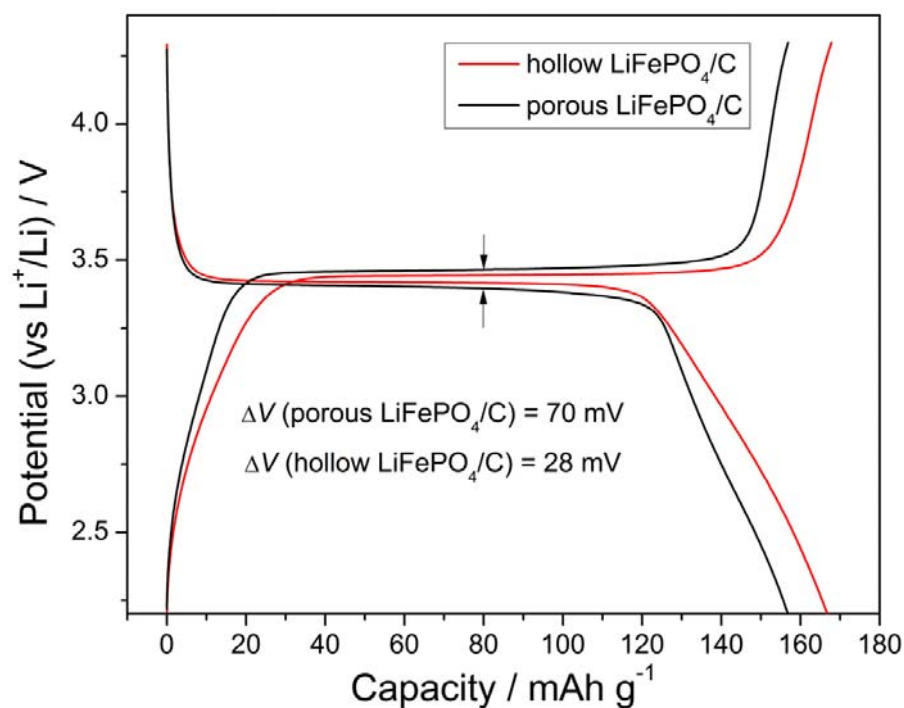

Fig. S8 Charge-discharge curves of the  $\text{LiFePO}_4/\text{C}$  composites at 0.1C

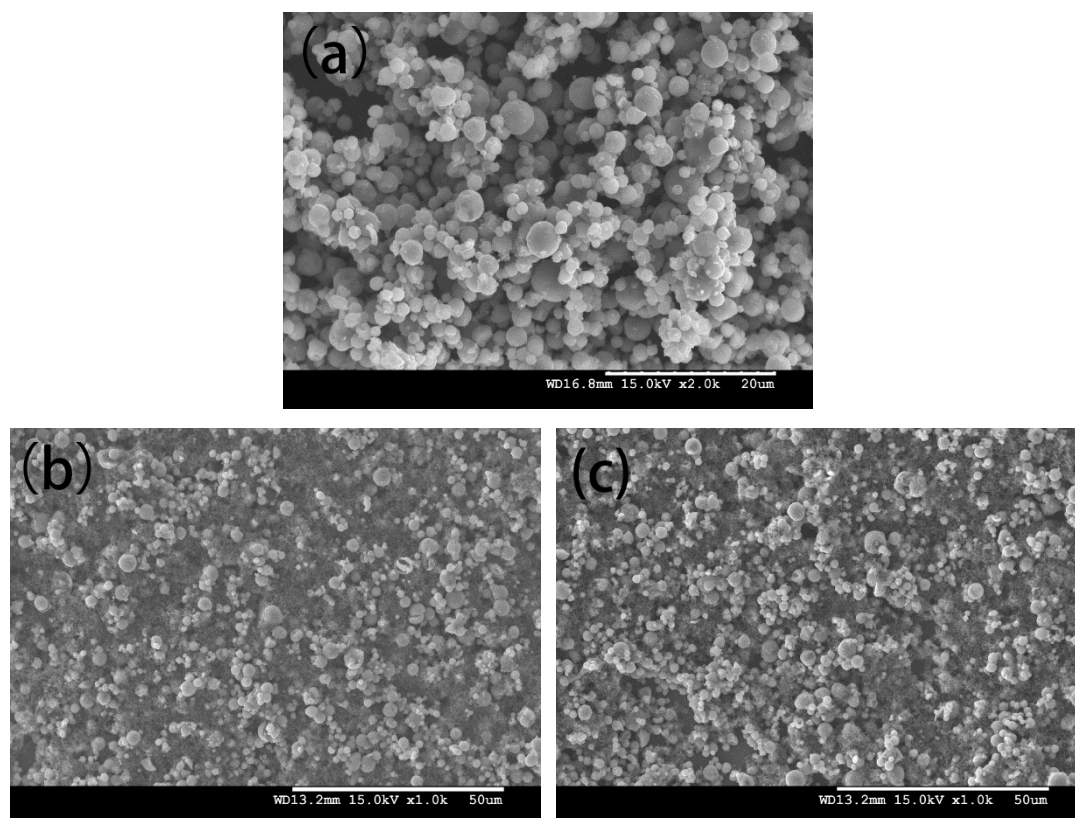

Fig. S9 SEM images of (a) LiFePO<sub>4</sub>/C hollow microspheres after mild grinding, (b) as-prepared hollow LiFePO<sub>4</sub>/C electrode, and (c) hollow LiFePO<sub>4</sub>/C electrode after 50 cycles at 1C (washed by ethanol to remove possible side products of electrolyte degradation)
